# Supplementary material for: Magnetic nanoclusters with hydrophilic spacing for dual drug delivery and sensitive magnetic resonance imaging
Source: Royal Society of Chemistry journal article supplement (doi:10.1039/c2tb00275b), 2012-12-14
Supplement: c2tb00275b.pdf [file c2tb00275b.pdf]

## Supporting Information

Figures S-1 and S-2 show details regarding the transverse and longitudinal relaxivities of *MBICs* and *MBIClusters* as a function of hydrodynamic size. This material is available free of charge via the Internet at <http://pubs.acs.org>.

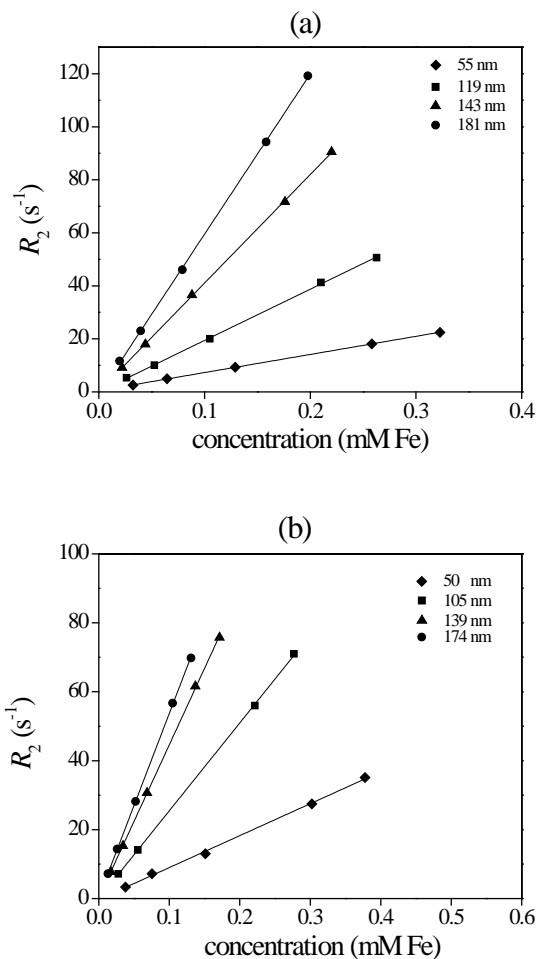

**Figure S-1.** Transverse relaxation rates of *MBICs* and *MBIClusters* with different intensity average diameters with a) 3.5K-6.8K H<sub>2</sub>N-PEO-PAA, and b) 3.5K-9.5K H<sub>2</sub>N-PEO-PAA as a function of iron concentration. Non-crosslinked *MBICs* are represented by the smallest of the average particle diameters in each case.

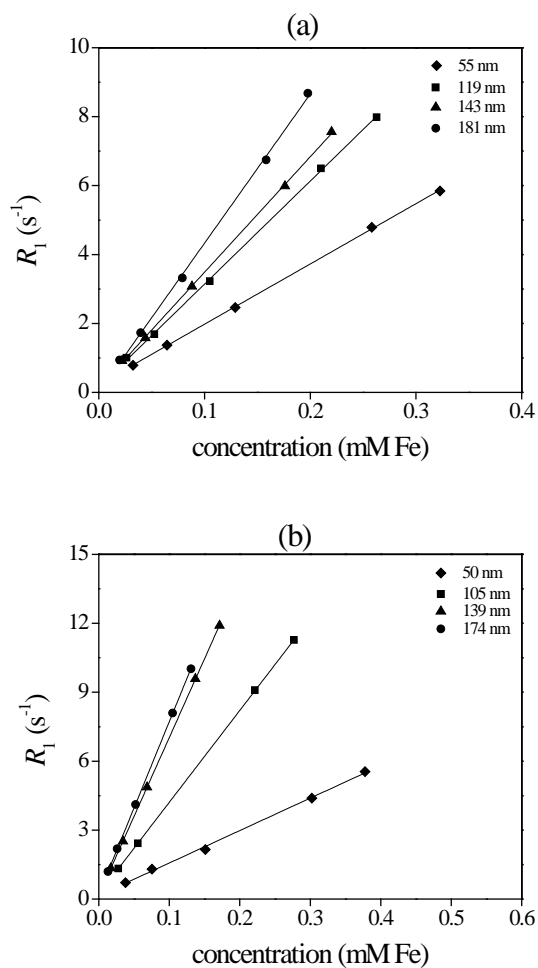

**Figure S-2.** Longitudinal relaxation rates of MBICs and *MBIClusters* with different intensity average diameters with a) 3.5K-6.8K H<sub>2</sub>N-PEO-PAA, and b) 3.5K-9.5K H<sub>2</sub>N-PEO-PAA as a function of iron concentration. Non-crosslinked MBICs are represented by the smallest of the average particle diameters in each case.

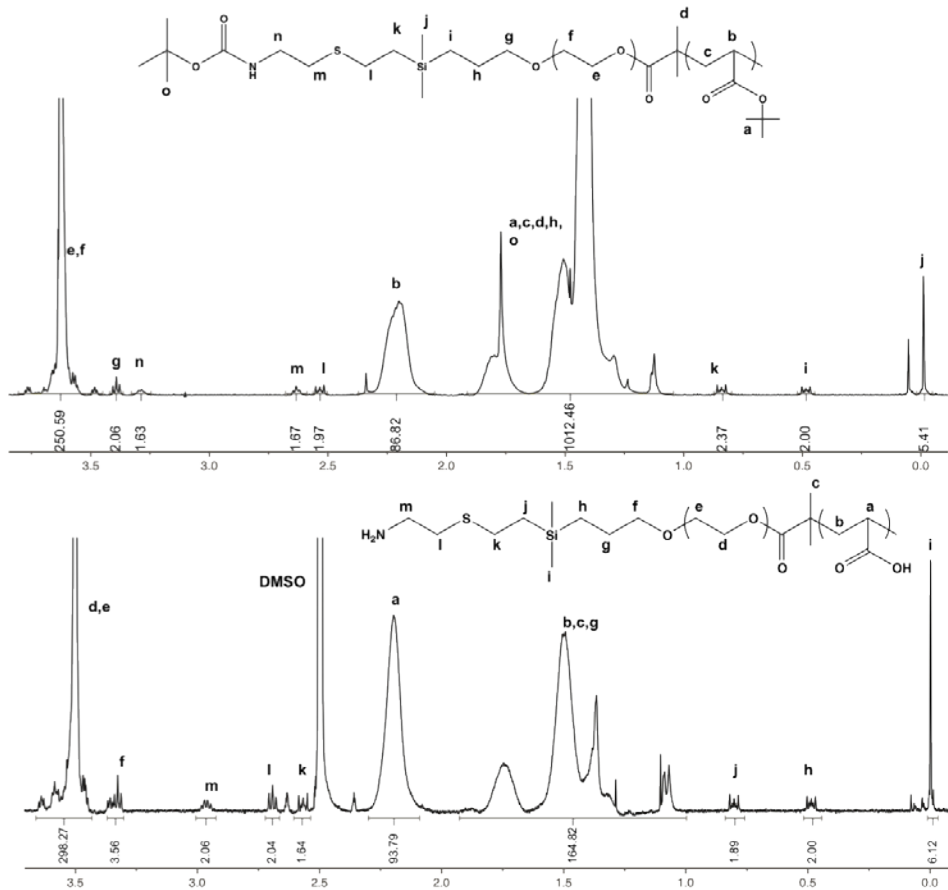

**Figure S-3.** <sup>1</sup>H NMR spectrum of *tboc*-NH-PEO-*b*-PtBA in CDCl<sub>3</sub> (top) and H<sub>2</sub>N-PEO-*b*-PAA in D<sub>6</sub>-DMSO (bottom)

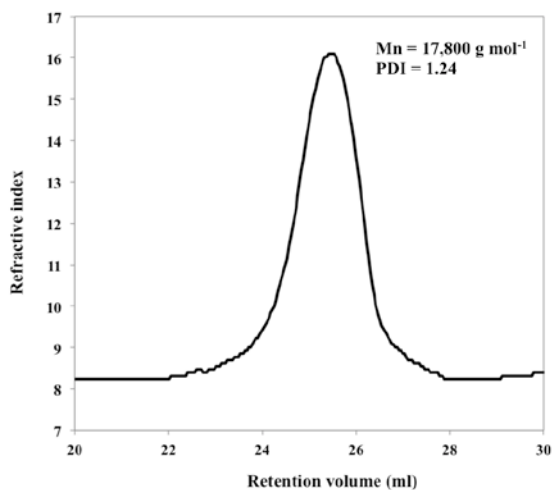

**Figure S-4.** SEC analysis of *tboc*-NH-PEO-*b*-PtBA

**Corresponding Author**

\*Judy Riffle, [jriffle@vt.edu](mailto:jriffle@vt.edu) or judyriffle@aol.com
